# Supplementary material
Source: MDPI journal article supplement (https://www.mdpi.com/2073-445X/12/1/202)
Supplement: s1 [file s1 › Table S1.pdf]

Table S1 : interview guide for the identification of ecosystem services

**I. The participant**

|                                |  |
|--------------------------------|--|
| <b>Interview n °</b>           |  |
| <b>Date</b>                    |  |
| <b>Time</b>                    |  |
| <b>Surname</b>                 |  |
| <b>First name</b>              |  |
| <b>Gender</b>                  |  |
| <b>Age</b>                     |  |
| <b>Village</b>                 |  |
| <b>Occupation and activity</b> |  |

Interview n °:

## **II. First mapping**

### ***1. General use and perception of the area***

Instruction : *Map the areas used, considered or perceived as important by the participant (from any point of view: professional, personal, etc.)*

Questions : what uses or interactions, why important, resources, management, access, etc.

Interview n°:

### ***III. Perception of ecosystem services***

Instructions: section by section, validate or not each point with the participant. If the ES is validated, indicate or draw on the map the area concerned and discuss about the ecosystem services details and benefits

#### **A. Provisioning section**

For each of the components identified with the participant, describe the service group concerned. Examples of questions:

- Which uses: food, fodder, medicinal, energy, raw material (construction...), agricultural, industrial...
- Which species in the case of plant or animal species? What other components?
- What period of the year?
- Which trend (increase, stable, decrease) and why ?
- What access to the resources and ecosystem services?

Interview n °:

| CICES group or class of ES | Area n ° | Description |
|----------------------------|----------|-------------|
| Cultivated plants          |          |             |
| Wild plants                |          |             |

Interview n °:

| CICES group or class of ES    | Area n ° | Description |
|-------------------------------|----------|-------------|
| Genetic materials from plants |          |             |
| Reared animals                |          |             |

Interview n °:

| CICES group or class of ES     | Area n ° | Description |
|--------------------------------|----------|-------------|
| Wild animals                   |          |             |
| Genetic materials from animals |          |             |

Interview n °:

| CICES group or class of ES | Area n ° | Description |
|----------------------------|----------|-------------|
| Surface water              |          |             |
| Groundwater                |          |             |

Interview n °:

| CICES group or class of ES                                    | Area n ° | Description |
|---------------------------------------------------------------|----------|-------------|
| Mineral substances<br><br>Examples: salt, pigment,<br>uranium |          |             |
| Non-mineral substances<br><br>Examples: solar, wind           |          |             |

Interview n<sup>o</sup>:

**B. Regulation & maintenance section**

For each of the components identified with the participant, describe the ecosystem services details and benefits. Example of questions:

- Which species in the case of plant or animal species? Which component of the area (abiotic also)?
- What time of year?
- What trend (increasing, stable, decreasing)? Why?

Interview n °:

| CICES group or class of ES                                                                                   | Area n ° | Description |
|--------------------------------------------------------------------------------------------------------------|----------|-------------|
| <p>Mediation of waste or toxic substances</p> <p>(Dust filtration, decomposition by plants, algae, etc.)</p> |          |             |
| <p>Control of erosion rate</p>                                                                               |          |             |

Interview n °:

| CICES group or class of ES                   | Area n ° | Description |
|----------------------------------------------|----------|-------------|
| Wind protection                              |          |             |
| Hydrological cycle and water flow regulation |          |             |

Interview n °:

| <b>CICES group or class of ES</b>                                       | <b>Area n °</b> | <b>Description</b> |
|-------------------------------------------------------------------------|-----------------|--------------------|
| Water condition<br><br>(Controlling the chemical quality of freshwater) |                 |                    |
| Pollination and seeds dispersal                                         |                 |                    |

Interview n °:

| CICES group or class of ES                  | Area n ° | Description |
|---------------------------------------------|----------|-------------|
| Maintaining nursery population and habitats |          |             |
| Pest and disease control                    |          |             |

Interview n °:

| CICES group or class of ES                                                                                                                 | Area n ° | Description |
|--------------------------------------------------------------------------------------------------------------------------------------------|----------|-------------|
| Regulation of soil quality                                                                                                                 |          |             |
| Regulation of temperature and humidity, including ventilation and transpiration<br><br>(Regulating the physical quality of air for people) |          |             |

Interview n °:

| CICES group or class of ES                                                                         | Area n ° | Description |
|----------------------------------------------------------------------------------------------------|----------|-------------|
| Regulation of chemical composition of atmosphere and oceans<br><br>(Regulating our global climate) |          |             |

Interview n °:

### **C. Cultural section**

For each of the components identified with the participant, describe and detail the ecosystem services involved and the benefits. Examples of questions:

- Which species in the case of plant or animal species?
- Which other component, if any (mountain, landscape element...)?
- What time of year?
- Which trend (increasing, stable, decreasing)?
- Why this trend?

Interview n °:

| CICES group or class of ES                                                                                                    | Area n ° | Description |
|-------------------------------------------------------------------------------------------------------------------------------|----------|-------------|
| Physical and experiential interactions with natural environment<br><br>(health, recuperation, enjoyment, recreation, tourism) |          |             |
| Scientific investigation or the creation of traditional ecological knowledge<br><br>(Researching nature)                      |          |             |

Interview n °:

| CICES group or class of ES                                                                    | Area n ° | Description |
|-----------------------------------------------------------------------------------------------|----------|-------------|
| Characteristics of living systems that enable education and training<br><br>(Studying nature) |          |             |
| Important in terms of culture or heritage                                                     |          |             |

Interview n °:

| CICES group or class of ES | Area n ° | Description |
|----------------------------|----------|-------------|
| Aesthetic experiences      |          |             |
| Symbolic meaning           |          |             |

Interview n °:

| CICES group or class of ES  | Area n ° | Description |
|-----------------------------|----------|-------------|
| Sacred or religious meaning |          |             |

Interview n<sup>o</sup>:

Other ES mentioned (if not in the box + check at the end of the interview if any other place, resource, landscape, component of nature is important for the interviewee)
