# Supplementary material
Source: MDPI journal article supplement (https://www.mdpi.com/2073-445X/12/1/202)
Supplement: s1 [file s1 › Table S2.pdf]

**Table S2.** *p*-value of the 13  $\chi^2$  test performed on the ecosystem services and landscape units matrix tables. A *p*-value < 0.05 rejects the H0 hypothesis (independence between ecosystem services at each level of CICES and landscape unit) and shows that the two variables are related.

| <b>CICES level of ecosystem services</b>    | <b>p-value</b> |
|---------------------------------------------|----------------|
| Section                                     | < 2.2e-16      |
| Division                                    | < 2.2e-16      |
| Group                                       | < 2.2e-16      |
| Class                                       | < 2.2e-16      |
| Division – provisioning section             | 3.457e-06      |
| Division – regulation & maintenance section | 1.041e-05      |
| Division – cultural section                 | < 2.2e-16      |
| Group – provisioning section                | < 2.2e-16      |
| Group – regulation & maintenance section    | < 2.2e-16      |
| Group – cultural section                    | < 2.2e-16      |
| Class – provisioning section                | < 2.2e-16      |
| Class – regulation & maintenance section    | < 2.2e-16      |
| Class – cultural section                    | < 2.2e-16      |
