# Supplementary material
Source: MDPI journal article supplement (https://www.mdpi.com/2073-445X/12/1/202)
Supplement: s1 [file s1 › Table S3.pdf]

**Table S3.** Links between ecosystem services class (C) (or group (G) when class contribution to the axes is not sufficient) and landscape units, according to the respective contributions of each variable to dimensions (axes) and their relative position on the contributed axes of the performed correspondence analysis. Table S3 summarizes the results of 6 correspondence analysis (Group of provisioning ecosystem services and landscape units; group of regulation & maintenance ecosystem services and landscape units; group of cultural ecosystem services and landscape units; class of provisioning ecosystem services and landscape units; class of regulation & maintenance ecosystem services and landscape units; class of cultural ecosystem services and landscape units)

| Landscape unit                      | Ecosystem service                                                                                                                               |
|-------------------------------------|-------------------------------------------------------------------------------------------------------------------------------------------------|
| <b>Provisioning</b>                 |                                                                                                                                                 |
| <b>Mountains</b>                    | Wild plants for nutrition (C)<br>Wild plants grazed by reared animals (C)<br>Surface water for drinking (C)<br>Surface water for irrigation (C) |
| <b>Foothills</b>                    | Cultivated plants (G)                                                                                                                           |
| <b>Steppe</b>                       | Cultivated plants for nutrition (C)<br>Cultivated plants for fodder (C)<br>Material from wild plants (medicinal use) (C)                        |
| <b>Lakes</b>                        | Wild plants grazed by reared animals (C)<br>Surface water as a material (for health) (C)                                                        |
| <b>Sand</b>                         | Wild plants grazed by reared animals (C)<br>Groundwater for drinking (C)<br>Mineral substance for energy (uranium) (C)                          |
| <b>River</b>                        | Wild plants grazed by reared animals (C)<br>Surface water as a material (for health) (C)                                                        |
| <b>Betpak-Dala</b>                  | Wild plants grazed by reared animals (C)<br>Groundwater for drinking (C)<br>Mineral substance for energy (uranium) (C)                          |
| <b>Village</b>                      | Reared animals for nutrition (C)<br>Reared animals for energy (manure) (C)<br>Groundwater for irrigation (C)                                    |
| <b>No landscape frontier</b>        | None                                                                                                                                            |
| <b>None</b>                         | Wild plants for energy<br>Wild animals for nutrition<br>Surface water for watering animals<br>Groundwater for watering animals                  |
| <b>Regulation &amp; maintenance</b> |                                                                                                                                                 |
| <b>Mountains</b>                    | Maintenance and regulation of temperature and humidity (abiotic) (C)                                                                            |
| <b>Foothills</b>                    | None                                                                                                                                            |
| <b>Steppe</b>                       | Control of erosion rate (C)                                                                                                                     |

| <b>Landscape unit</b>        | <b>Ecosystem service</b>                                                                                                                                                                                |
|------------------------------|---------------------------------------------------------------------------------------------------------------------------------------------------------------------------------------------------------|
| <b>Lakes</b>                 | Maintenance of physical, chemical, abiotic conditions (G)                                                                                                                                               |
| <b>Sand</b>                  | Control of erosion rate (C)                                                                                                                                                                             |
| <b>River</b>                 | None                                                                                                                                                                                                    |
| <b>Betpak-Dala</b>           | None                                                                                                                                                                                                    |
| <b>Village</b>               | Decomposition and fixing processes and their effect on soil quality (C)                                                                                                                                 |
| <b>No Landscape frontier</b> | Maintaining nursery population and habitat (C)<br>Seed dispersal (C)                                                                                                                                    |
| <b>None</b>                  | Wind protection<br>Pollination<br>Regulation of temperature and humidity (biotic)<br>Filtration/sequestration/storage/accumulation by plants                                                            |
| <b>Cultural</b>              |                                                                                                                                                                                                         |
| <b>Mountains</b>             | Characteristics of living systems that enable aesthetic experiences (C)<br>Natural, abiotic characteristics of nature that enable intellectual and representative interaction: aesthetic experience (C) |
| <b>Foothills</b>             | Characteristics of living systems that that enable activities promoting health, recuperation or enjoyment through active or immersive interactions (C)                                                  |
| <b>Steppe</b>                | Physical and experiential interactions with natural environment (G)<br>Intellectual and representative interactions with natural environment (G)                                                        |
| <b>Lakes</b>                 | Natural, abiotic characteristics of nature that enable spiritual, symbolic and other interaction (C)                                                                                                    |
| <b>Sand</b>                  | Characteristics of living systems that that enable activities promoting health, recuperation or enjoyment through active or immersive interactions (C)                                                  |
| <b>River</b>                 | Natural, abiotic characteristics of nature that enable active or passive physical and experiential interactions promoting health, recuperation or enjoyment (C)                                         |
| <b>Betpak-Dala</b>           | None                                                                                                                                                                                                    |
| <b>Village</b>               | Natural, abiotic characteristics of nature that enable intellectual and representative interaction: aesthetic experience (C)                                                                            |
| <b>No Landscape frontier</b> | Characteristics or features of living systems that have an existence value (C)<br>Characteristics or features of living systems that have an option or bequest value (C)                                |
| <b>None</b>                  | None                                                                                                                                                                                                    |
